# Supplementary material for: Wall shear stress analysis using 17.6 Tesla MRI: A longitudinal study in ApoE-/- mice with histological analysis
Source: PubMed Central journal article supplement (PMC7454980; doi:10.1371/journal.pone.0238112), 2020-08-28
Supplement: pone.0238112.s007.pdf [file pone.0238112.s007.pdf]

|                     | Mice number | 1. Measurement point (1 week) | 2. Measurement point (8 weeks) | 3. Measurement point (12 weeks) |
|---------------------|-------------|-------------------------------|--------------------------------|---------------------------------|
| <b>Western Diet</b> | 1           | MR                            | MR                             | MR → Histo                      |
|                     | 2           | MR                            | MR                             | MR → Histo                      |
|                     | 3           | MR                            | MR                             | MR                              |
|                     | 4           | MR                            | MR                             | MR → Histo                      |
|                     | 5           | MR → Histo                    |                                |                                 |
|                     | 6           |                               | MR                             | MR                              |
|                     | 7           |                               | MR                             | MR → Histo                      |
|                     | 8           |                               | MR                             | MR                              |
|                     | 9           |                               | MR → Histo                     |                                 |
|                     | 10          |                               | MR                             | MR                              |
|                     | 11          |                               | MR                             |                                 |
|                     | 12          |                               | MR                             | MR                              |
| <b>Chow Diet</b>    | 13          | MR                            | MR                             | MR                              |
|                     | 14          | MR                            | MR                             | MR                              |
|                     | 15          | MR                            | MR                             | MR                              |
|                     | 16          | MR → Histo                    |                                |                                 |
|                     | 17          | MR                            | MR                             | MR → Histo                      |
|                     | 18          |                               | MR → Histo                     |                                 |
|                     | 19          |                               | MR → Exitus                    |                                 |
|                     | 20          |                               | MR → Histo                     |                                 |
