# Supplementary material for: Wall shear stress analysis using 17.6 Tesla MRI: A longitudinal study in ApoE-/- mice with histological analysis
Source: PubMed Central journal article supplement (PMC7454980; doi:10.1371/journal.pone.0238112), 2020-08-28

**A**

| Volume V [ml] | Time t [s] | Flow V/t [ml/s] |
|---------------|------------|-----------------|
| 100           | 34.18      | 2.926           |
| 100           | 34.65      | 2.886           |
| 100           | 33.92      | 2.948           |
| 100           | 34.15      | 2.928           |
| 100           | 35.53      | 2.815           |
| 100           | 33.49      | 2.986           |
| 100           | 33.83      | 2.956           |
| 100           | 35.28      | 2.834           |
| 100           | 34.54      | 2.895           |

**B**

| MR section plane | Diameter [mm] | Flow [ml/s] |
|------------------|---------------|-------------|
| +4               | 3.870         | 2.858       |
| +3               | 3.897         | 2.996       |
| +2               | 3.875         | 3.096       |
| +1               | 3.877         | 3.081       |
| 0                | 3.861         | 3.151       |
| -1               | 3.891         | 2.882       |
| -2               | 3.894         | 2.882       |
| -3               | 3.888         | 2.946       |
| -4               | 3.868         | 2.916       |

**C**

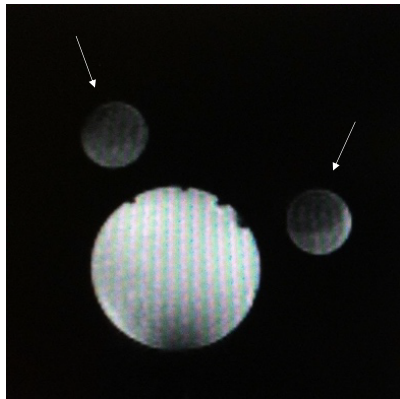

Supplement: pone.0238112.s008.pdf [file pone.0238112.s008.pdf]
