# Supplementary material for: Wall shear stress analysis using 17.6 Tesla MRI: A longitudinal study in ApoE-/- mice with histological analysis
Source: PubMed Central journal article supplement (PMC7454980; doi:10.1371/journal.pone.0238112), 2020-08-28

**A**

| Volume V [ml] | Time t [s] | Flow V/t [ml/s] |
|---------------|------------|-----------------|
| 100           | 456.62     | 0.219           |
| 100           | 452.49     | 0.221           |
| 100           | 450.45     | 0.222           |
| 100           | 454.55     | 0.220           |
| 100           | 446.43     | 0.224           |
| 100           | 456.62     | 0.219           |
| 100           | 452.49     | 0.221           |
| 100           | 458,72     | 0.218           |
| 100           | 446.43     | 0.224           |
| 100           | 462.96     | 0.216           |

**B**

| MR section plane | Diameter [mm] | Flow [ml/s] |
|------------------|---------------|-------------|
| 1                | 0.975         | 0.206       |
| 2                | 0.972         | 0.216       |
| 3                | 0.968         | 0.220       |
| 4                | 0.978         | 0.216       |

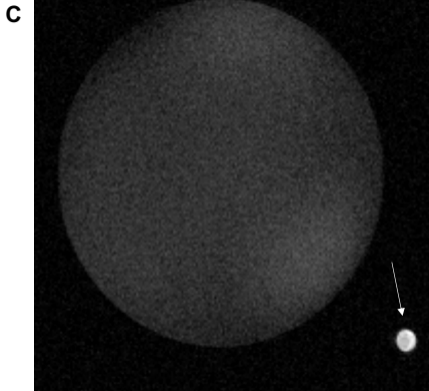

Supplement: pone.0238112.s009.pdf [file pone.0238112.s009.pdf]
